# Supplementary material for: Renoprotective effect of SGLT-2 inhibitors among type 2 diabetes patients with different baseline kidney function: a multi-center study
Source: PubMed Central journal article supplement (PMC8499571; doi:10.1186/s12933-021-01396-2), 2021-10-07
Supplement: 12933_2021_1396_MOESM1_ESM.pdf [file 12933_2021_1396_MOESM1_ESM.pdf]

## **SUPPLEMENTARY INFORMATION**

**ARTICLE TITLE:** Renoprotective Effect of SGLT-2 Inhibitors among Type 2 Diabetes Patients with Different Baseline Kidney Function: A Multi-Center Study

**AUTHORS:** Fang-Ju Lin, PhD; hi-Chuan Wang, PhD; Chien-Ning Hsu, PhD, RPh; Chen-Yi Yang, MS; Chih-Yuan Wang, MD, PhD; Huang-Tz Ou, PhD

**Table S1.** Patient characteristics of overall study cohort and subgroups stratified by baseline estimated glomerular filtration rate (eGFR) level (i.e.,  $\leq 60$ ,  $<60-90$ ,  $>90$  mL/min/1.73 m<sup>2</sup>) before propensity score matching

| Characteristics                                                          | Overall              |                   | eGFR $\leq 60$ mL/min/1.73 m <sup>2</sup> |                   | 60<eGFR $\leq 90$ mL/min/1.73 m <sup>2</sup> |                   | eGFR $>90$ mL/min/1.73 m <sup>2</sup> |                   |
|--------------------------------------------------------------------------|----------------------|-------------------|-------------------------------------------|-------------------|----------------------------------------------|-------------------|---------------------------------------|-------------------|
|                                                                          | SGLT-2is<br>n=14,020 | oGLDs<br>n=61,928 | SGLT-2is<br>n=2,323                       | oGLDs<br>n=23,295 | SGLT-2is<br>n=5,959                          | oGLDs<br>n=20,301 | SGLT-2is<br>n=5,738                   | oGLDs<br>n=18,332 |
| Age (years), mean (SD)                                                   | 60.3 (11.6)          | 65.5 (13.0)       | 67.7 (10.2)                               | 70.8 (11.4)       | 62.1 (10.3)                                  | 65.5 (11.6)       | 55.5 (11.4)                           | 58.8 (13.1)       |
| Male, n (%)                                                              | 8,169 (58.3)         | 32,970 (53.2)     | 1,331 (57.3)                              | 12,219 (52.5)     | 3,780 (63.4)                                 | 11,919 (58.7)     | 3,058 (53.3)                          | 9,388 (51.2)      |
| Baseline HbA1c (%), mean (SD)                                            | 8.68 (1.5)           | 8.33 (1.7)        | 8.66 (1.5)                                | 8.23 (1.8)        | 8.54 (1.4)                                   | 8.28 (1.6)        | 8.81 (1.5)                            | 8.52 (1.7)        |
| Baseline HbA1c (mmol/mol), mean*                                         | 71                   | 68                | 71                                        | 66                | 70                                           | 67                | 73                                    | 70                |
| Baseline eGFR (mL/min/1.73 m <sup>2</sup> ), mean (SD)                   | 86.3 (27.3)          | 72.0 (36.3)       | 48.8 (9.5)                                | 35.8 (16.6)       | 75.6 (8.48)                                  | 75.1 (8.56)       | 112.6 (19.4)                          | 114.7 (23.1)      |
| eGFR $>90$ , n (%)                                                       | 5,738 (40.9)         | 18,332 (29.6)     | -                                         | -                 | -                                            | -                 | 5,738 (100.0)                         | 18,332 (100.0)    |
| 60<eGFR $\leq 90$ , n (%)                                                | 5,959 (42.5)         | 20,301 (32.8)     | -                                         | -                 | 5,959 (100.0)                                | 20,301 (100.0)    | -                                     | -                 |
| eGFR $\leq 60$ , n (%)                                                   | 2,323 (16.6)         | 23,295 (37.6)     | 2,323 (100.0)                             | 23,295 (100.0)    | -                                            | -                 | -                                     | -                 |
| eGFR change in year before index date (SD) (mL/min/1.73 m <sup>2</sup> ) | -1.56 (13.2)         | -1.86 (16.1)      | -4.12 (9.4)                               | -5.80 (12.5)      | -2.94 (11.7)                                 | -2.55 (14.1)      | 0.91 (15.3)                           | 3.90 (20.1)       |
| Presence of microvascular diseases, n (%)                                | 6,495 (46.3)         | 27,118 (43.8)     | 1,321 (56.9)                              | 13,133 (56.4)     | 2,666 (44.7)                                 | 7,316 (36.0)      | 2,278 (39.7)                          | 5,691 (31.0)      |
| History of cardiovascular disease, n (%)                                 |                      |                   |                                           |                   |                                              |                   |                                       |                   |
| Myocardial infarction                                                    | 741 (5.3)            | 3,453 (5.6)       | 177 (7.6)                                 | 1,994 (8.6)       | 352 (5.9)                                    | 976 (4.8)         | 212 (3.7)                             | 483 (2.6)         |
| Unstable angina                                                          | 2,120 (15.1)         | 9,415 (15.2)      | 477 (20.5)                                | 4,516 (19.4)      | 1,026 (17.2)                                 | 3,120 (15.4)      | 666 (11.6)                            | 1,887 (10.3)      |
| Stroke                                                                   | 1,926 (13.7)         | 14,715 (23.8)     | 486 (20.9)                                | 7,125 (30.6)      | 924 (15.5)                                   | 4,661 (23.0)      | 516 (9.0)                             | 2,929 (16.0)      |
| Heart failure                                                            | 1,405 (10.0)         | 8,847 (14.3)      | 432 (18.6)                                | 5,457 (23.4)      | 599 (10.1)                                   | 2,221 (10.9)      | 374 (6.5)                             | 1,169 (6.4)       |

|                           |               |               |              |               |              |               |              |               |
|---------------------------|---------------|---------------|--------------|---------------|--------------|---------------|--------------|---------------|
| Atrial fibrillation       | 594 (4.2)     | 4,272 (6.9)   | 191 (8.2)    | 2,389 (10.3)  | 285 (4.8)    | 1,277 (6.3)   | 116 (2.0)    | 596 (3.3)     |
| Peripheral artery disease | 701 (5.0)     | 4,774 (7.7)   | 224 (9.6)    | 2,895 (12.4)  | 307 (5.2)    | 1,168 (5.8)   | 170 (3.0)    | 711 (3.9)     |
| History of frailty, n (%) | 1,782 (12.7)  | 21,831 (35.3) | 423 (18.2)   | 10,484 (45.0) | 742 (12.5)   | 5,862 (28.9)  | 617 (10.8)   | 5,485 (29.9)  |
| History of GLD use, n (%) |               |               |              |               |              |               |              |               |
| Metformin                 | 11,098 (79.2) | 30,710 (49.6) | 1,563 (67.3) | 8,495 (36.5)  | 4,798 (80.5) | 11,311 (55.7) | 4,737 (82.6) | 10,904 (59.5) |
| Sulfonylurea              | 6,649 (47.4)  | 19,804 (32.0) | 1,265 (54.5) | 8,938 (38.4)  | 2,792 (46.9) | 5,797 (28.6)  | 2,592 (45.2) | 5,069 (27.7)  |
| DPP-4 inhibitor           | 10,004 (71.4) | 27,319 (44.1) | 1,737 (74.8) | 12,000 (51.5) | 4,327 (72.6) | 8,206 (40.4)  | 3,940 (68.7) | 7,113 (38.8)  |
| Thiazolidinedione         | 3,540 (25.2)  | 5,725 (9.2)   | 571 (24.6)   | 2,426 (10.4)  | 1,597 (26.8) | 1,781 (8.8)   | 1,372 (23.9) | 1,518 (8.3)   |
| GLP-1 receptor agonist    | 381 (2.7)     | 1,208 (2.0)   | 54 (2.3)     | 462 (2.0)     | 117 (2.0)    | 296 (1.5)     | 210 (3.7)    | 450 (2.5)     |
| Insulin                   | 3,118 (22.2)  | 14,619 (23.6) | 658 (28.3)   | 7,489 (32.1)  | 1,246 (20.9) | 3,573 (17.6)  | 1,214 (21.2) | 3,557 (19.4)  |
| Total number of GLD class | 1.60 (1.16)   | 2.48 (1.09)   | 1.71 (1.17)  | 2.52 (1.05)   | 1.53 (1.15)  | 2.50 (1.09)   | 1.56 (1.16)  | 2.45 (1.10)   |
| Other medications, n (%)  |               |               |              |               |              |               |              |               |
| Antihypertensive drug     | 10,376 (74.0) | 45,318 (73.2) | 2,102 (90.5) | 19,832 (85.1) | 4,717 (79.2) | 14,857 (73.2) | 3,557 (62.0) | 10,589 (57.8) |
| ACE inhibitor             | 1,171 (8.4)   | 4,923 (7.9)   | 238 (10.2)   | 2,204 (9.5)   | 559 (9.4)    | 1,636 (8.1)   | 374 (6.5)    | 1,083 (5.9)   |
| ARB                       | 8,063 (57.5)  | 32,140 (51.9) | 1,681 (72.4) | 14,486 (62.2) | 3,711 (62.3) | 10,671 (52.6) | 2,671 (46.5) | 6,984 (38.1)  |
| $\beta$ -blocker          | 5,182 (37.0)  | 22,804 (36.8) | 1,199 (51.6) | 10,955 (47.0) | 2,413 (40.5) | 7,135 (35.1)  | 1,570 (27.4) | 4,714 (25.7)  |
| Loop diuretic             | 1,107 (7.9)   | 11,768 (19.0) | 466 (20.1)   | 7,830 (33.6)  | 407 (6.8)    | 2,325 (11.5)  | 234 (4.1)    | 1,613 (8.8)   |
| Thiazide diuretic         | 492 (3.5)     | 2,161 (3.5)   | 128 (5.5)    | 1,170 (5.0)   | 240 (4.0)    | 623 (3.1)     | 124 (2.2)    | 368 (2.0)     |
| Aldosterone antagonist    | 598 (4.3)     | 4,212 (6.8)   | 211 (9.1)    | 2,413 (10.4)  | 254 (4.3)    | 1,083 (5.3)   | 133 (2.3)    | 716 (3.9)     |
| Statin                    | 8,781 (62.6)  | 31,150 (50.3) | 1,505 (64.8) | 12,027 (51.6) | 3,755 (62.3) | 10,613 (52.3) | 3,521 (61.4) | 8,510 (46.4)  |

Abbreviations: ARB: angiotensin receptor blocker; DPP-4 inhibitor: dipeptidyl peptidase 4 inhibitor; GLD: glucose-lowering drug; GLP-1 receptor agonist: glucagon-like peptide 1 receptor agonist; HbA1c: hemoglobin A1c; oGLDs: other glucose-lowering drugs; SD: standard deviation; SE: standard error; SGLT-2is: sodium glucose cotransporter-2 inhibitors.

**Table S2.** Composition of sodium glucose cotransporter-2 inhibitor (SGLT-2i) and other glucose-lowering drug (oGLD) groups in terms of total follow-up time in overall cohort

| Years of follow-up (% of time in overall study cohort and within each study healthcare delivery system) | Overall      | CGMH         | NCKUH      | NTUH         |
|---------------------------------------------------------------------------------------------------------|--------------|--------------|------------|--------------|
| SGLT-2i group                                                                                           |              |              |            |              |
| Dapagliflozin                                                                                           | 4950 (47.2)  | 3,764 (45.8) | 162 (25.4) | 1,023 (63.2) |
| Empagliflozin                                                                                           | 5528 (52.8)  | 4,455 (54.2) | 476 (74.6) | 597 (36.8)   |
| oGLD group                                                                                              |              |              |            |              |
| Metformin                                                                                               | 1,404 (15.1) | 1,204 (16.7) | 27 (4.7)   | 173 (11.2)   |
| Sulfonylurea                                                                                            | 1,566 (16.8) | 1,204 (16.7) | 105 (18.2) | 258 (16.7)   |
| Meglitinides                                                                                            | 257 (2.8)    | 144 (2.0)    | 42 (7.3)   | 72 (4.6)     |
| DPP-4 inhibitor                                                                                         | 1,519 (16.3) | 1,092 (15.2) | 121 (21.1) | 306 (19.8)   |
| Thiazolidinedione                                                                                       | 1,355 (14.6) | 1,043 (14.5) | 63 (11.0)  | 249 (16.2)   |
| Acarbose                                                                                                | 1,246 (13.4) | 977 (13.6)   | 80 (13.9)  | 189 (12.3)   |
| GLP-1 receptor agonist                                                                                  | 588 (6.3)    | 487 (6.8)    | 21 (3.6)   | 80 (5.2)     |
| Insulin                                                                                                 | 1,376 (14.8) | 1,046 (14.5) | 115 (20.1) | 215 (13.9)   |

Abbreviations: CGMH: Chang Gung Memorial Hospital; DPP-4 inhibitor: dipeptidyl peptidase 4 inhibitor; GLP-1 receptor agonist: glucagon-like peptide 1 receptor agonist; NCKUH: National Cheng Kung University Hospital; NTUH: National Taiwan University Hospital.

**Table S3.** Mean follow-up time (months) for sodium glucose cotransporter-2 inhibitor (SGLT-2i) and other glucose-lowering drug (oGLD) (intention-to-treat analysis)

|                           | Overall<br>(n=27,332) | CGMH<br>(n=20,992) | NCKUH<br>(n=2,202) | NTUH<br>(n=4,138) |
|---------------------------|-----------------------|--------------------|--------------------|-------------------|
| <b>30% eGFR reduction</b> |                       |                    |                    |                   |
| SGLT-2i group             | 9.17                  | 9.38               | 6.96               | 9.28              |
| oGLD group                | 8.10                  | 8.16               | 6.19               | 8.77              |
| <b>40% eGFR reduction</b> |                       |                    |                    |                   |
| SGLT-2i group             | 9.20                  | 9.40               | 6.96               | 9.35              |
| oGLD group                | 8.14                  | 8.20               | 6.22               | 8.83              |
| <b>50% eGFR reduction</b> |                       |                    |                    |                   |
| SGLT-2i group             | 9.20                  | 9.40               | 6.96               | 9.37              |
| oGLD group                | 8.16                  | 8.22               | 6.23               | 8.88              |

Abbreviations: CGMH: Chang Gung Memorial Hospital; eGFR: estimated glomerular filtration rate; NCKUH: National Cheng Kung University Hospital; NTUH: National Taiwan University Hospital.

**Figure S1.** Data elements of the study-specific common data model

| Demographic                                                                                                                                                                                                                                                                           | Dispensing                                                                                                                                                                                                                                 | Vital Signs                                                                                                                                                                                                                | Laboratory Result                                                                                                                                                                                                                                                                                                                                                                                                            |
|---------------------------------------------------------------------------------------------------------------------------------------------------------------------------------------------------------------------------------------------------------------------------------------|--------------------------------------------------------------------------------------------------------------------------------------------------------------------------------------------------------------------------------------------|----------------------------------------------------------------------------------------------------------------------------------------------------------------------------------------------------------------------------|------------------------------------------------------------------------------------------------------------------------------------------------------------------------------------------------------------------------------------------------------------------------------------------------------------------------------------------------------------------------------------------------------------------------------|
| <ul style="list-style-type: none"> <li>❖ Patient ID</li> <li>❖ Birth Date</li> <li>❖ Sex</li> </ul>                                                                                                                                                                                   | <ul style="list-style-type: none"> <li>❖ Dispensing Date</li> <li>❖ National Health Insurance Drug Code</li> <li>❖ Local Drug Code</li> <li>❖ Days Supply</li> <li>❖ Amount Dispensed</li> </ul>                                           | <ul style="list-style-type: none"> <li>❖ Height</li> <li>❖ Weight</li> <li>❖ Measure Date</li> <li>❖ Measure Time</li> <li>❖ Tobacco Use</li> <li>❖ Tobacco Type</li> <li>❖ Created Date of Tobacco Information</li> </ul> | <ul style="list-style-type: none"> <li>❖ Abbreviated Test Name</li> <li>❖ Result Type</li> <li>❖ Fasting Indicator</li> <li>❖ Specimen Source</li> <li>❖ Logical Codes for Lab Tests</li> <li>❖ Test Ordered Date</li> <li>❖ Lab Date</li> <li>❖ Lab Time</li> <li>❖ Result Date</li> <li>❖ Result Time</li> <li>❖ Result Value</li> <li>❖ Result Unit</li> <li>❖ Normal Reference Range</li> <li>❖ Facility Code</li> </ul> |
| Encounter                                                                                                                                                                                                                                                                             | Diagnosis                                                                                                                                                                                                                                  |                                                                                                                                                                                                                            |                                                                                                                                                                                                                                                                                                                                                                                                                              |
| <ul style="list-style-type: none"> <li>❖ Encounter ID</li> <li>❖ Admission Date</li> <li>❖ Discharge Date</li> <li>❖ Provider</li> <li>❖ Facility Location</li> <li>❖ Encounter Type</li> <li>❖ Facility Code</li> <li>❖ Discharge Disposition</li> <li>❖ Discharge Status</li> </ul> | <ul style="list-style-type: none"> <li>❖ Encounter ID</li> <li>❖ Admission Date</li> <li>❖ Provider</li> <li>❖ Encounter Type</li> <li>❖ Diagnosis Code</li> <li>❖ Diagnosis Code Type</li> <li>❖ Principal Discharge Diagnosis</li> </ul> |                                                                                                                                                                                                                            |                                                                                                                                                                                                                                                                                                                                                                                                                              |

**Figure S2.** Flow chart of cohort selection

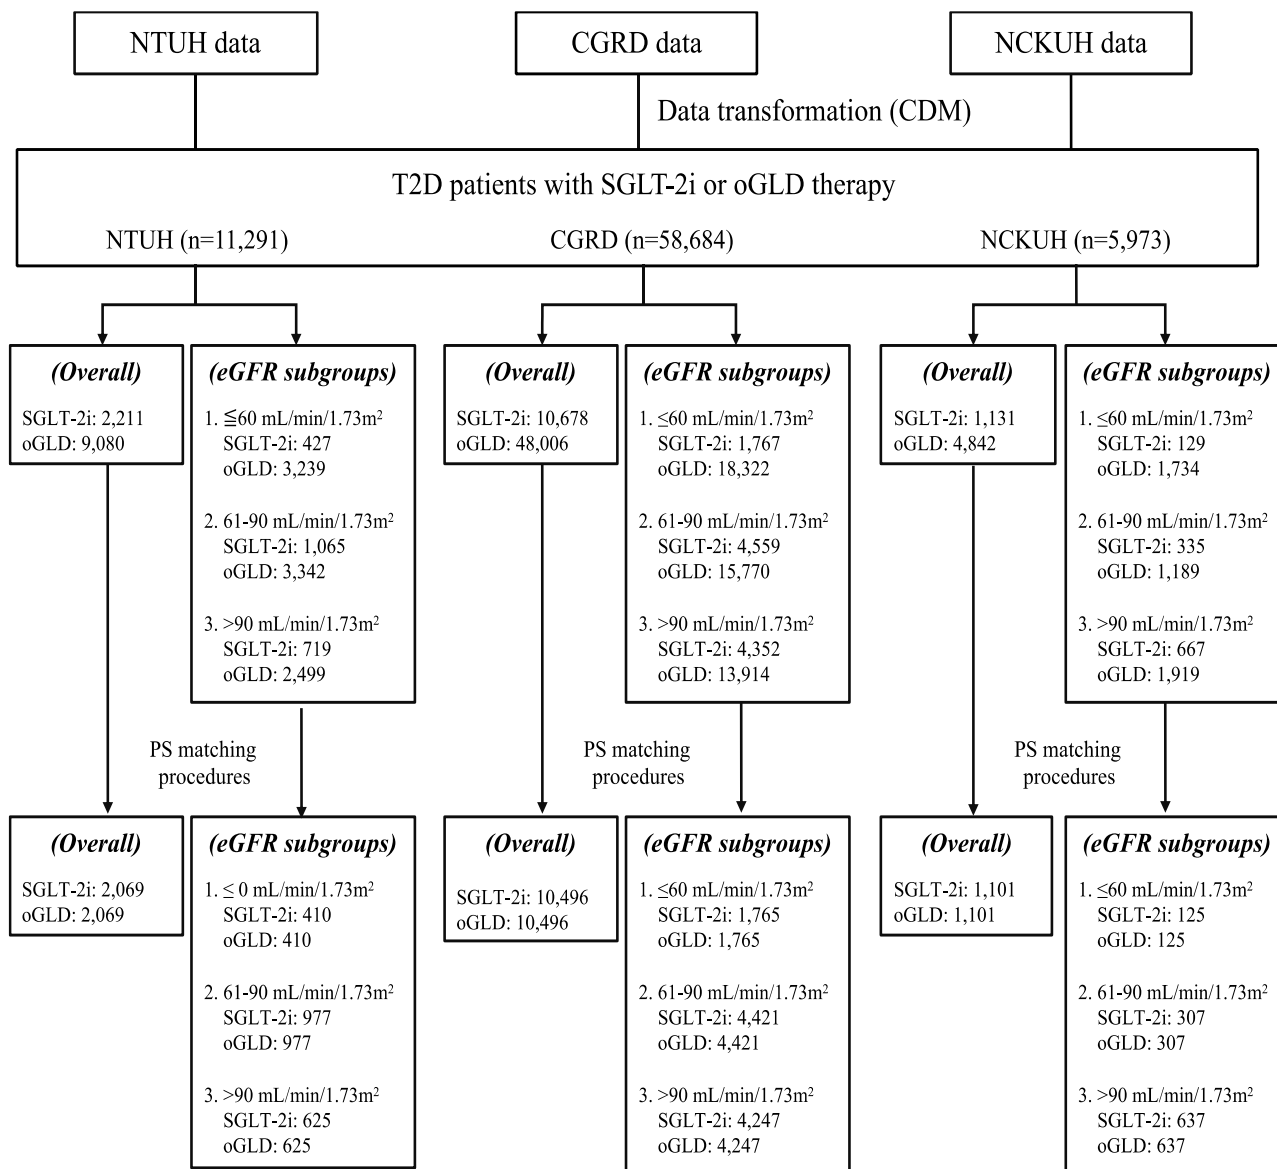

Abbreviations: CGMH: Chang Gung Memorial Hospital; CDM: common data model; eGFR: estimated glomerular filtration rate; NCKUH: National Cheng Kung University Hospital; NTUH: National Taiwan University Hospital; oGLD: other glucose-lowering drug; PS: propensity score; SGLT-2i: sodium glucose cotransporter-2 inhibitor.

Note: PS matching procedures were conducted for matching SGLT-2i users with those treated with oGLDs.

**Figure S3.** Change in estimated glomerular filtration rate (eGFR) over time before and after initiation of sodium glucose cotransporter-2 inhibitor (SGLT-2i) or other glucose-lowering drug (oGLD) therapy (on-treatment analysis) in overall study cohort from (a) Chang Gung Memorial Hospital (CGMH), (b) National Cheng Kung University Hospital (NCKUH), and (c) National Taiwan University Hospital (NTUH)

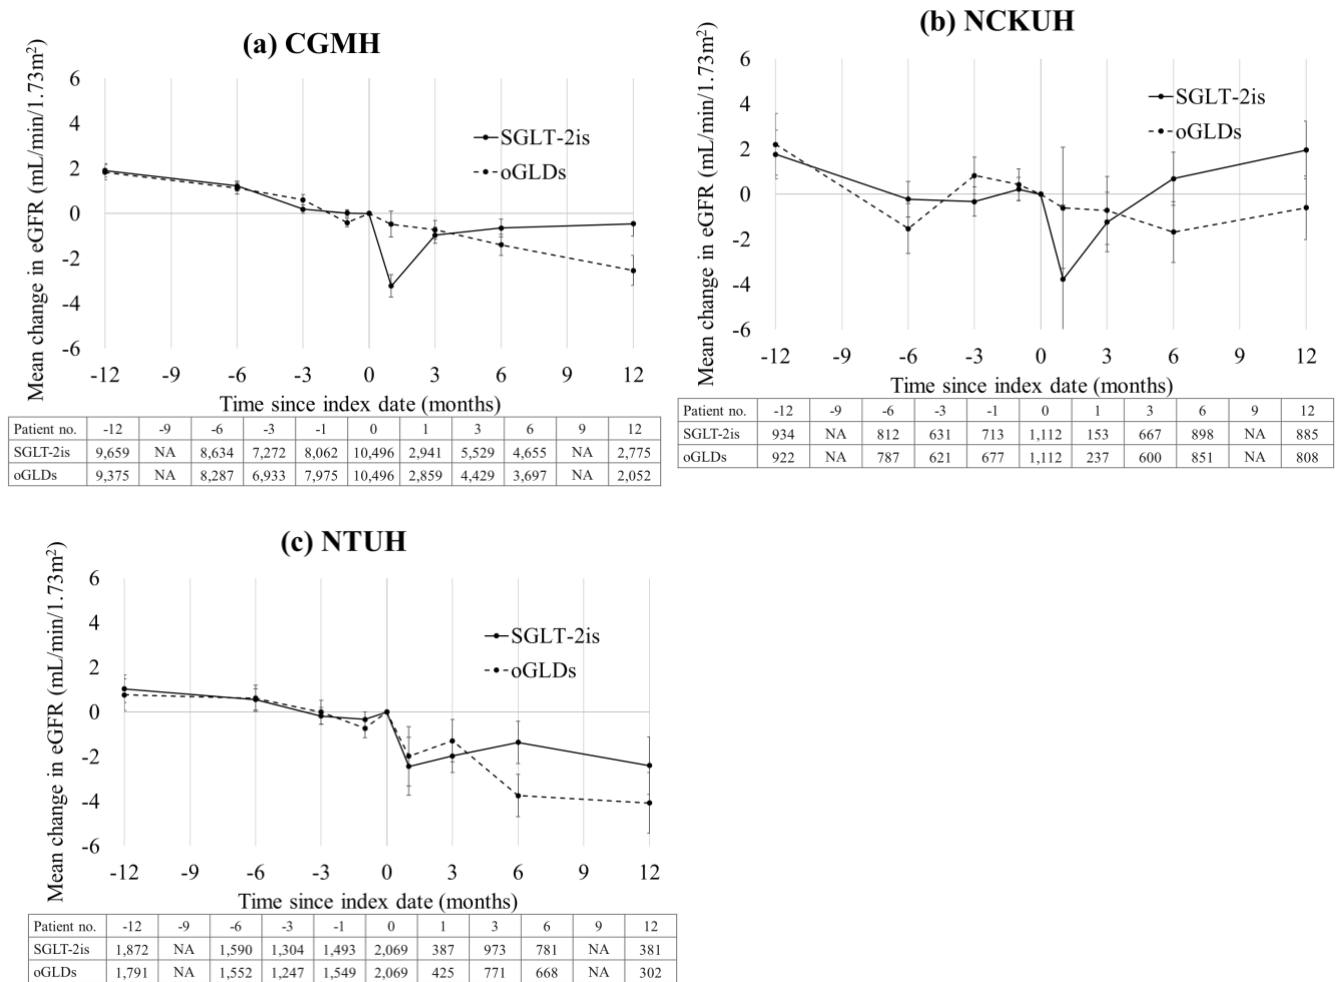

Note: Means of change in eGFR are plotted with standard error bars. The bottom tables present the number of eGFR observations available at each time point.



**Figure S4.** Forest plots for 30%, 40%, and 50% eGFR reduction of sodium glucose cotransporter-2 inhibitor (SGLT-2i) versus other glucose-lowering drug (oGLD) use in overall study cohort and in each estimated glomerular filtration rate (eGFR) subgroup (on-treatment analysis)

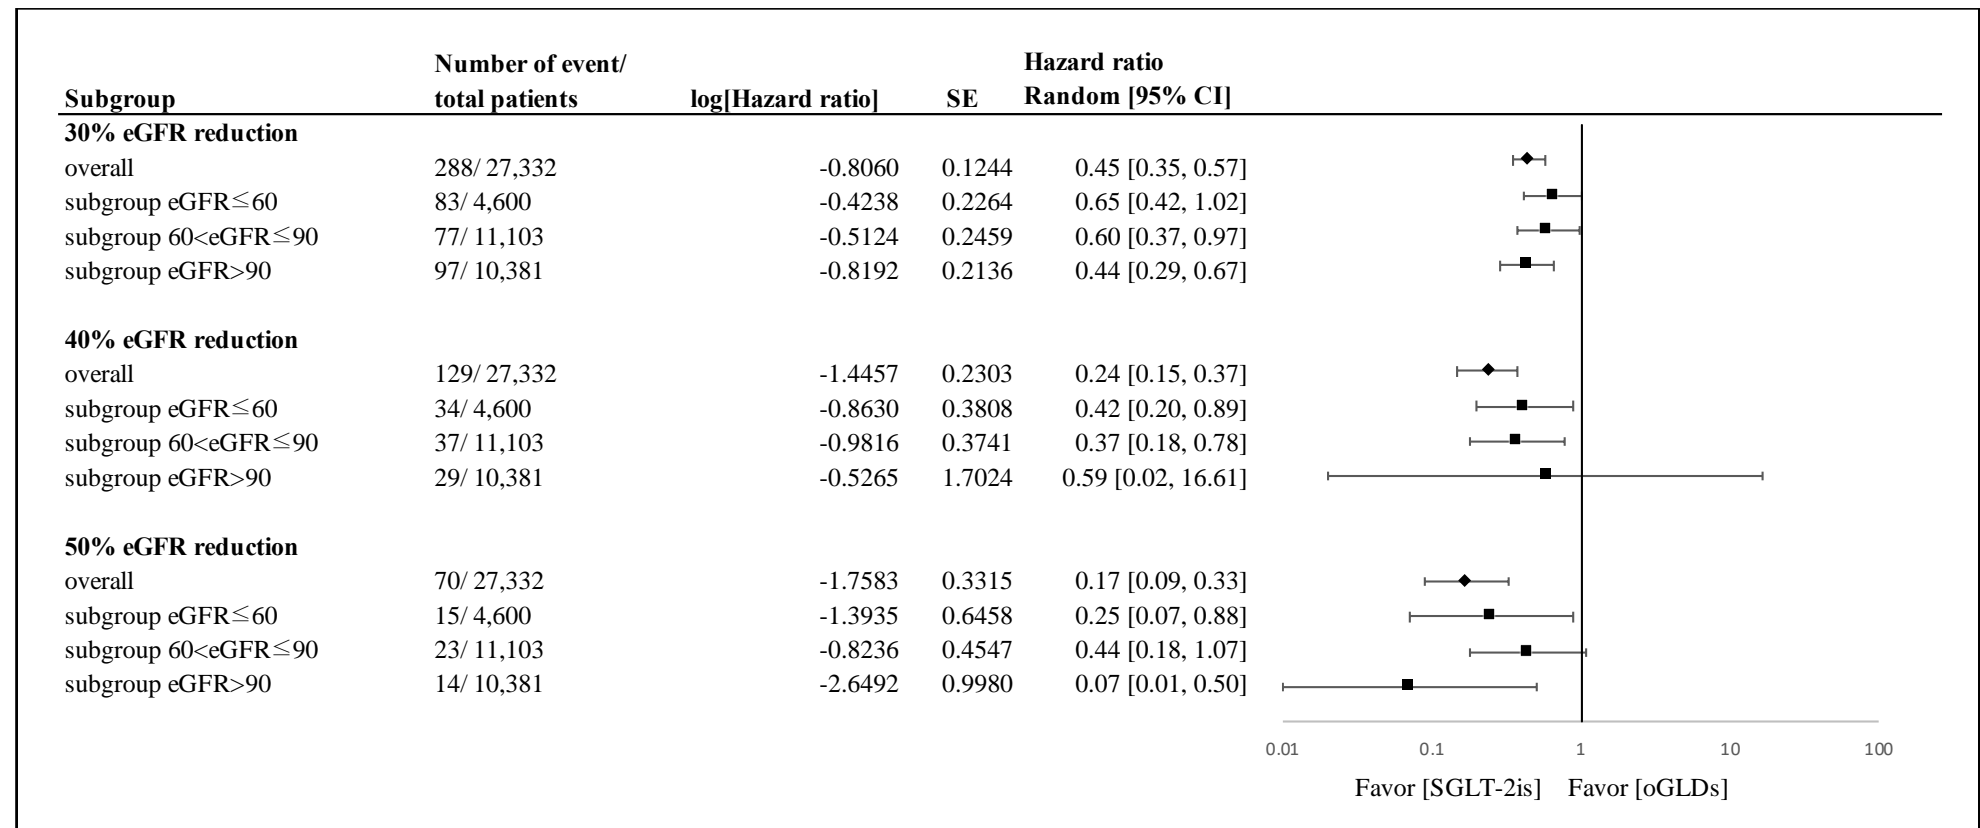

Abbreviation: SE: standard error, CI: confidence interval.

**Figure S5.** Forest plots for 30%, 40%, and 50% estimated glomerular filtration rate (eGFR) reduction of sodium glucose cotransporter-2 inhibitor (SGLT-2i) versus other glucose-lowering drug (oGLD) use (intention-to-treat analysis) in overall study cohort from CGMH, NCKUH, and NTUH

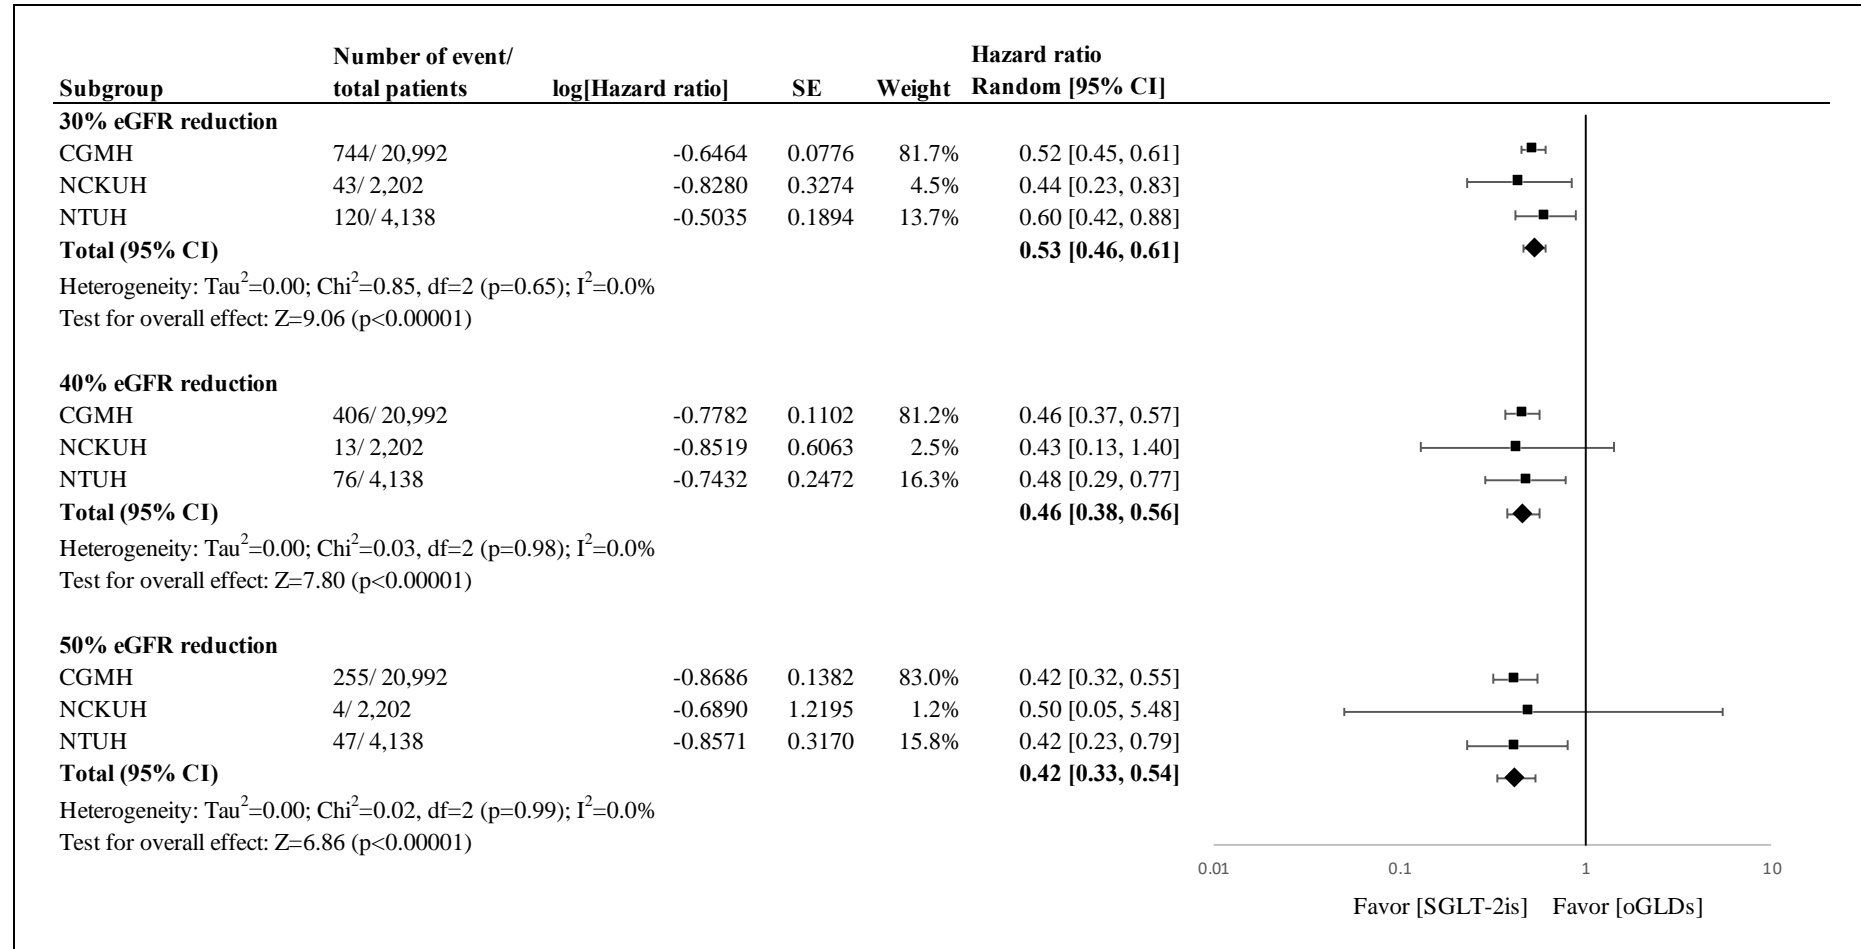

Abbreviation: CGMH: Chang Gung Memorial Hospital; CI: confidence interval; NCKUH: National Cheng Kung University Hospital; NTUH: National Taiwan University Hospital; SE: standard error.

**Figure S6.** Forest plots for 30%, 40%, and 50% estimated glomerular filtration rate (eGFR) reduction of sodium glucose cotransporter-2 inhibitor (SGLT-2i) versus other glucose-lowering drug (oGLD) use (on-treatment analysis) in overall study cohort from CGMH, NCKUH, and NTUH

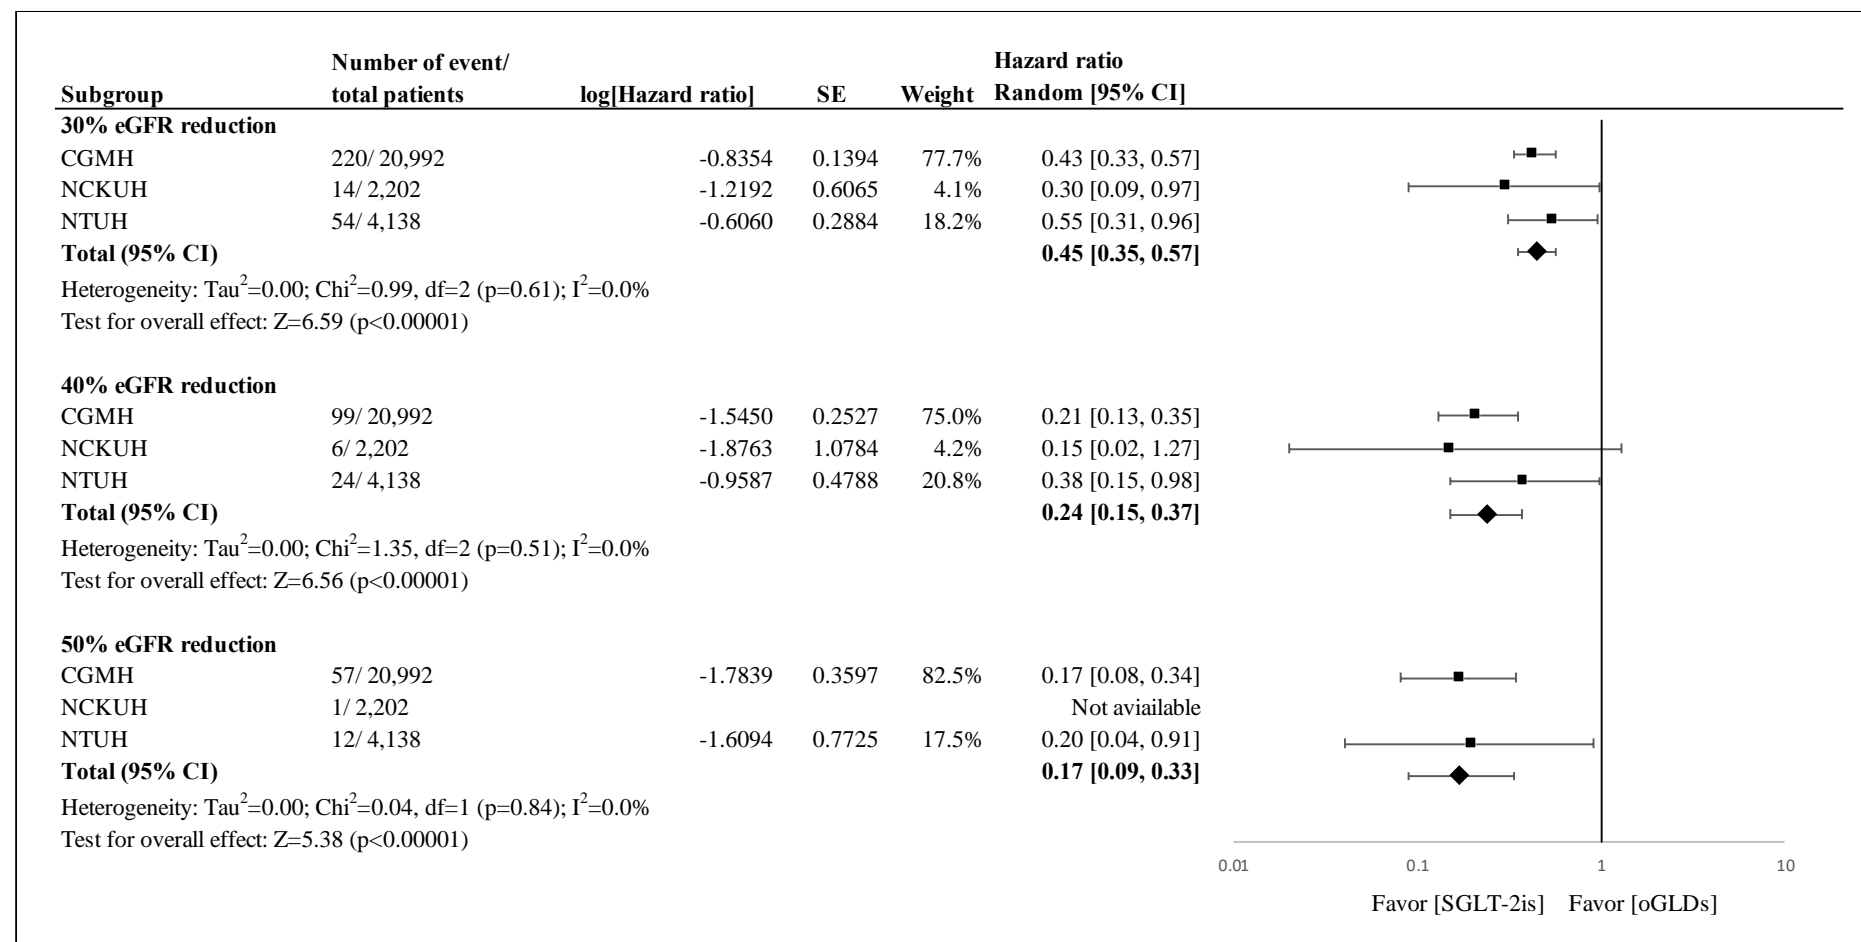

Abbreviation: CGMH: Chang Gung Memorial Hospital; CI: confidence interval; NCKUH: National Cheng Kung University Hospital; NTUH: National Taiwan University Hospital; SE: standard error.

Note: Because no patients reached 50% eGFR reduction in NCKUH, the hazard ratio estimate for this hospital site was not available.
